# Supplementary material
Source: publisher site journal article supplement (https://www.dovepress.com/article/574816)
Supplement: Supplementary file 1 [file 574816_Supplementary%20Methods_1.docx]

**Supplementary Methods**

**scRNA-seq Analysis**

Data processing was performed using the R package "Seurat." Cells with a mitochondrial gene percentage above 10%, an erythrocyte gene expression percentage above 3%, fewer than 300 expressed genes, or more than 7,000 expressed genes were excluded to ensure high-quality data. Batch effects between samples were eliminated using the "harmony" package, and data normalization was performed using the ScaleData function, followed by Principal Component Analysis (PCA). Cell clusters were identified using the "FindClusters" function and visualized through UMAP plots.

**Immunohistochemical (IHC) Staining**

Synovial specimens were fixed in 4% paraformaldehyde at 4°C for 48 hours, embedded in liquid paraffin, and subjected to two consecutive 10-hour permeabilization treatments, followed by overnight heating at 60°C. Paraffin blocks were sectioned into 5 μm slices. Tissue sections were incubated with Calprotectin monoclonal antibody (clone MAC387, Invitrogen, Ref: MA1-81381, Waltham, MA, USA) diluted at 1:600 overnight. Sections were washed with PBS, incubated with HRP-secondary antibodies for 30 minutes, stained with DAB in PBS, and counterstained with neutral background reagent. Immunohistochemical images were first converted to RGB and subjected to color deconvolution using the H-DAB plugin in ImageJ to separate DAB signal from hematoxylin (H). A global threshold was then applied uniformly across all images to identify DAB-positive areas, based on negative control background staining, and binary masks were generated for quantification. For each sample, three high-magnification fields were analyzed using ImageJ, and the positive staining area was calculated as the percentage of DAB-positive pixels relative to the total tissue area, a method consistent with previously published ImageJ-based IHC quantification workflows. 1

**Supplementary Figures**


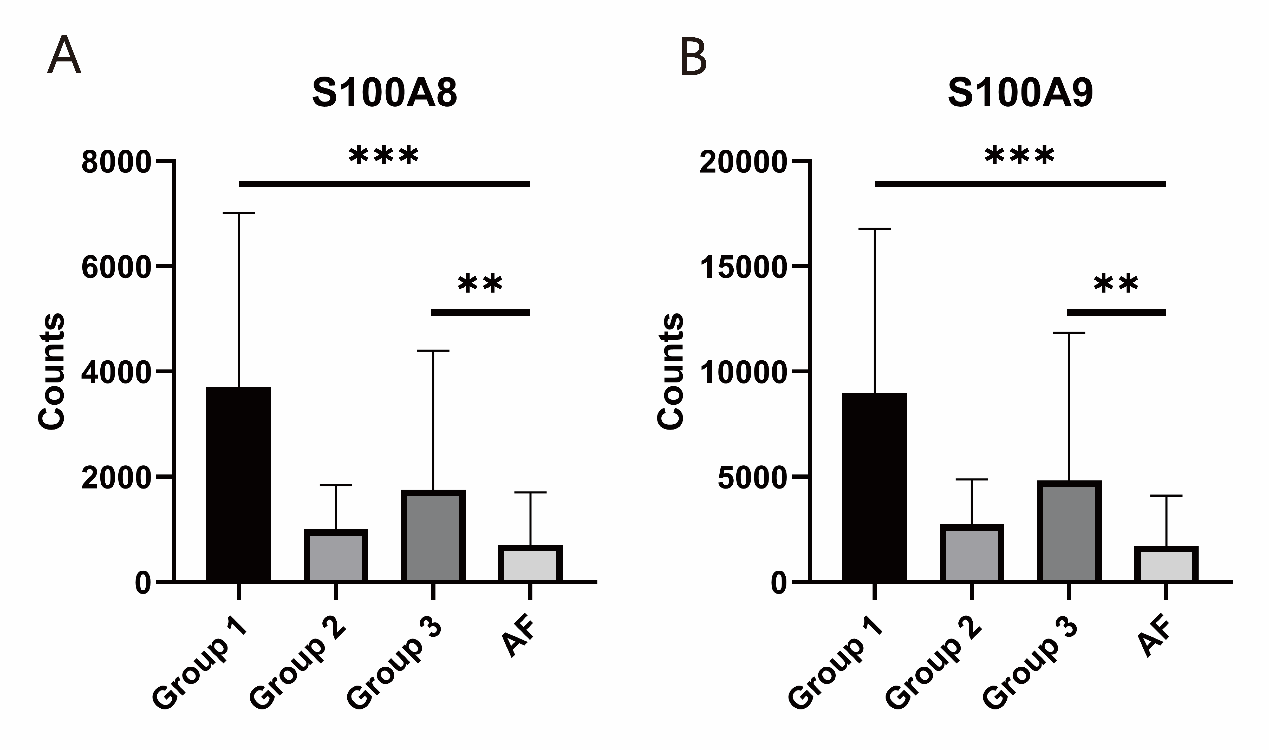


**Figure S1. S100A8/A9 expression in PJI samples stratified by infective pathogen. A. Boxplots showing S100A8 expression across S. aureus PJI, S. epidermidis PJI, Non-S. aureus/****S. epidermidis PJI, and AF samples. B. Boxplots showing S100A9 expression across the same groups. *** represents P < 0.001, ** represents P < 0.01, * represents P < 0.05.**


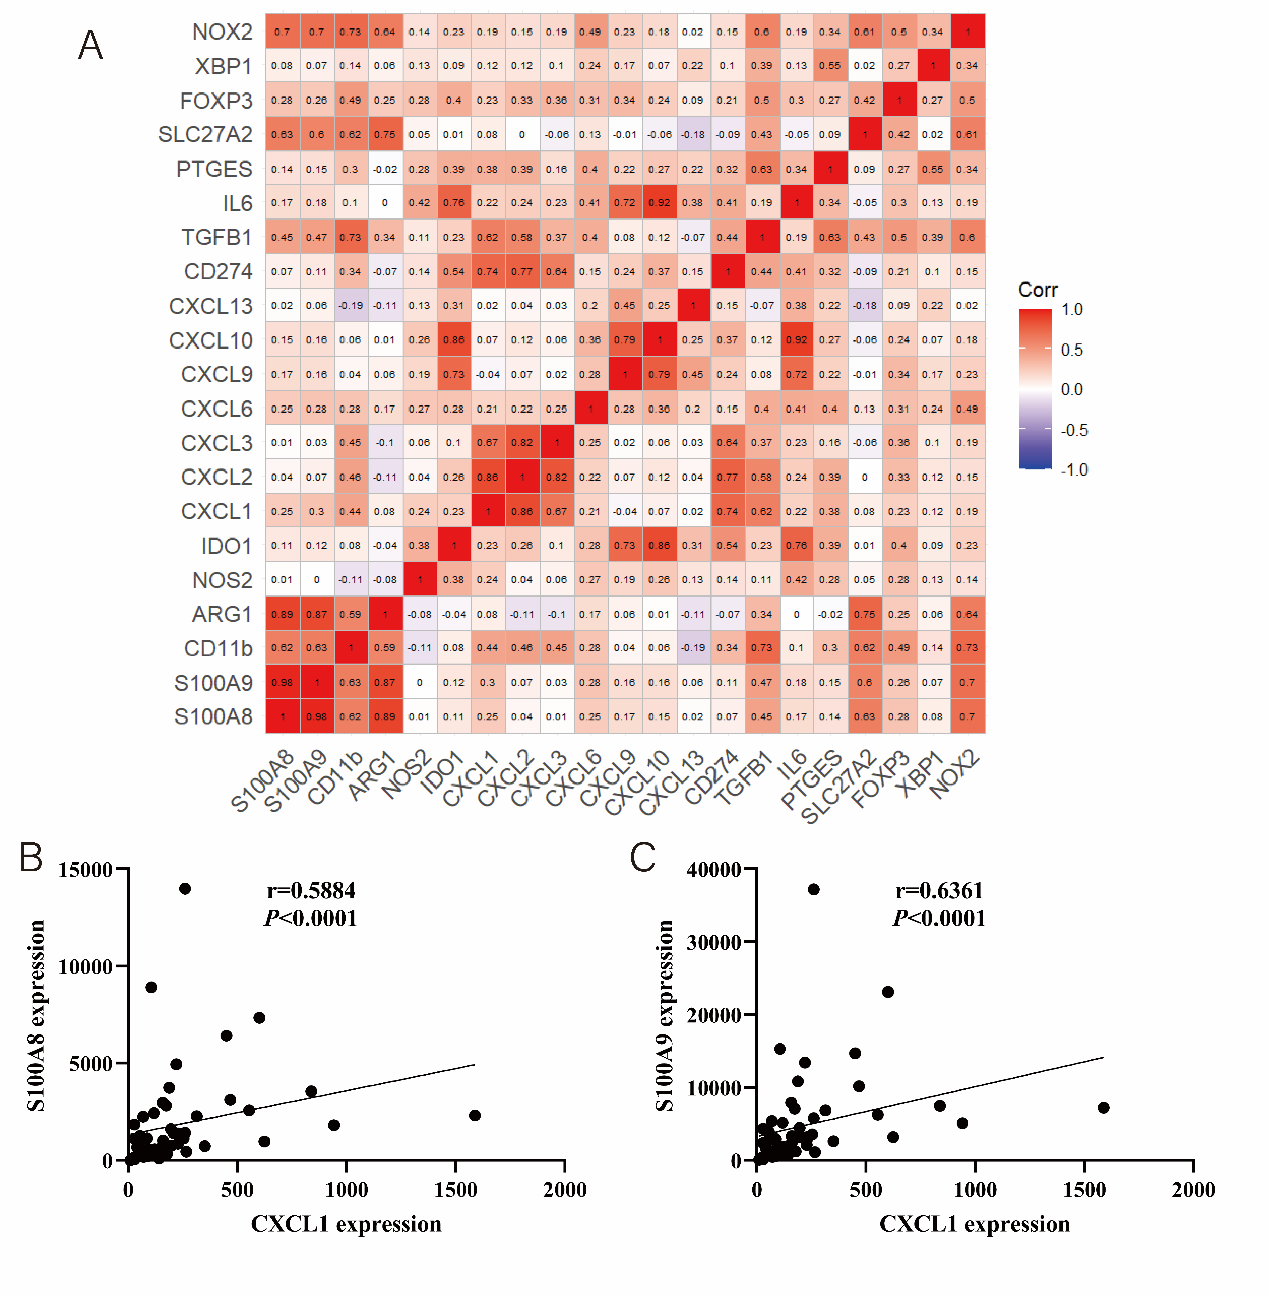


**Figure S2. ESTIMATE analysis of immune and stromal scores in PJI and AF samples. A–C. Comparison of ESTIMATE, immune, and stromal scores between PJI patients and AF controls. D–F. Comparison of ESTIMATE, immune, and stromal scores between S100A8 high expression PJI patients and S100A8 low expression PJI patients. G–I. Comparison of ESTIMATE, immune, and stromal scores between S100A9 high expression PJI patients and S100A9 low expression PJI patients.**


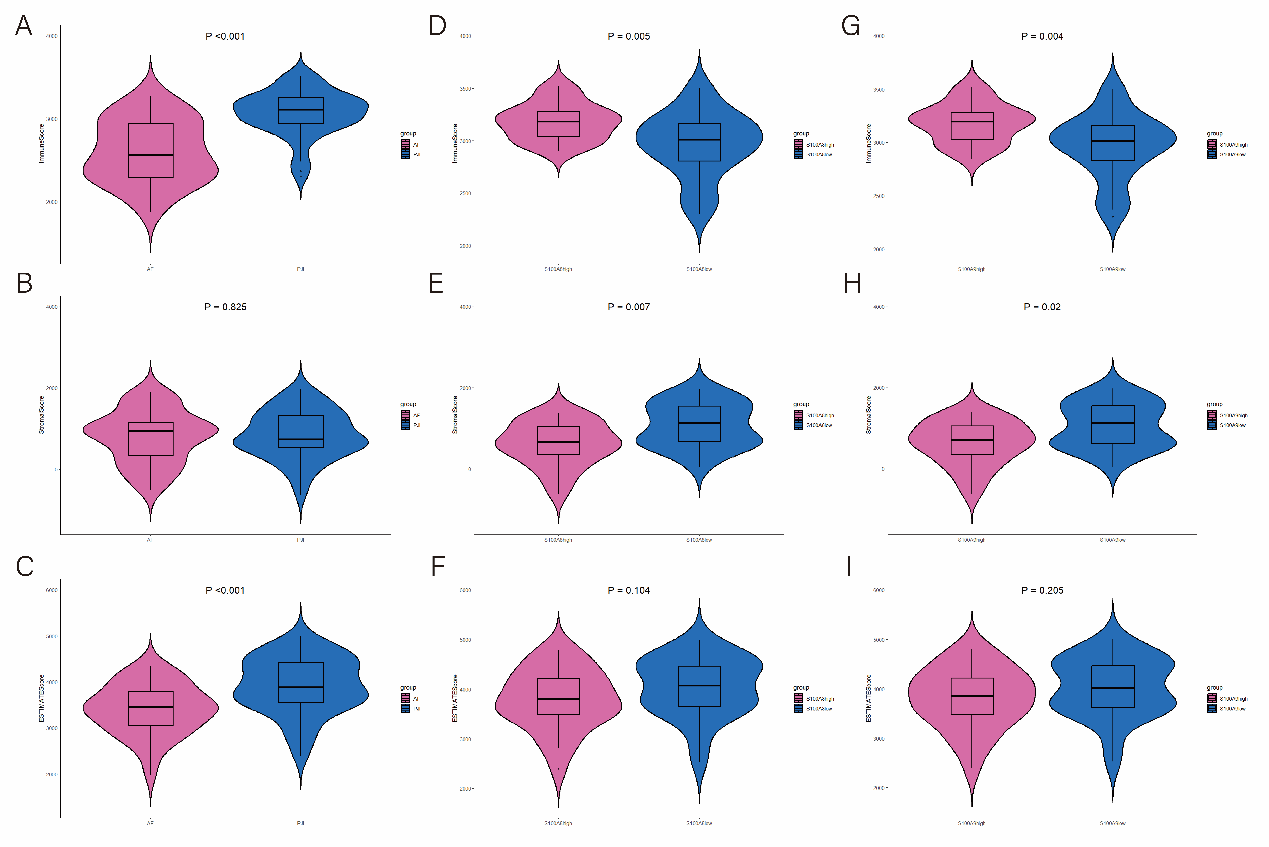


**Figure S3. Correlation between S100A8/S100A9 expression and MDSC-recruiting chemokines in PJI synovial tissue. A. Heatmap showing the correlation of S100A8 and S100A9 expression with multiple MDSC-recruiting chemokines. B. Scatter plot of S100A8 expression versus CXCL1 expression. C. Scatter plot of S100A9 expression versus CXCL1 expression.**

**References:**

1. Konsti, J.; Lundin, M.; Linder, N., et al. (2012). Effect of image compression and scaling on automated scoring of immunohistochemical stainings and segmentation of tumor epithelium. Diagn Pathol. 7(29. doi: 10.1186/1746-1596-7-29
